# Supplementary material for: Coastal high-frequency radars in the Mediterranean – Part 2: Applications in support of science priorities and societal needs
Source: Copernicus journal article supplement (doi:10.5194/os-18-797-2022), 2022-06-01
Supplement: Supplementary file 1 [file os-18-797-2022-supplement.zip]

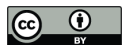

## *Supplement of*

# **Coastal high-frequency radars in the Mediterranean – Part 2: Applications in support of science priorities and societal needs**

**Emma Reyes et al.**

*Correspondence to:* Emma Reyes (ereyes@socib.es)

- os-18-797-2022-supplement-title-page.pdf
- \_\_MACOSX
  - os-2021-115-supplement-figures
    - \* .\_Fig\_S1.png
    - \* .\_Fig\_S2.png
    - \* .\_Fig\_S3.png
- os-2021-115-supplement-figures
  - Fig\_S1.png
  - Fig\_S2.png
  - Fig\_S3.png

The copyright of individual parts of the supplement might differ from the article licence.
